# Supplementary material
Source: PubMed Central journal article supplement (PMC4517619)
Supplement: NIHMS525611-supplement-1_si_001.pdf [file NIHMS525611-supplement-1_si_001.pdf]

## Viscosity of ring polymer melts

Rossana Pasquino<sup>\*†</sup>, Thodoris C. Vasilakopoulos<sup>2</sup>, Youn Cheol Jeong<sup>3</sup>, Hyojoon Lee<sup>3</sup>, Simon Rogers<sup>1</sup>, George Sakellariou<sup>2</sup>, Jürgen Allgaier<sup>4</sup>, Atsushi Takano<sup>5</sup>, Ana R. Brás<sup>4</sup>, Taihyun Chang<sup>3</sup>, Sebastian Gooßen<sup>4</sup>, Wim Pyckhout-Hintzen<sup>4</sup>, Andreas Wischnewski<sup>4</sup>, Nikos Hadjichristidis<sup>2,6</sup>, Dieter Richter<sup>4</sup>, Michael Rubinstein<sup>7</sup> and Dimitris Vlassopoulos<sup>1,8</sup>

<sup>1</sup> FORTH, Institute for Electronic Structure and Laser, Heraklion 7110, Greece

<sup>2</sup> University of Athens, Department of Chemistry, Athens 15771, Greece

<sup>3</sup> Pohang University of Science and Technology, Division of Advanced Materials Science and Department of Chemistry, Pohang 790-784, Korea

<sup>4</sup> Forschungszentrum Jülich GmbH, Jülich 52428, Germany

<sup>5</sup> Department of Applied Chemistry, Graduate School of Engineering, Nagoya University, Furo-cho, Chikusa-ku, Nagoya 464-8603, Japan

<sup>6</sup> King Abdullah University of Science and Technology, Division of Physical Sciences & Engineering, KAUST Catalysis Center, Polymer Synthesis Laboratory, Thuwal, Kingdom of Saudi Arabia

<sup>7</sup> Department of Chemistry, University of North Carolina, Chapel Hill, North Carolina 27599-3290, USA

<sup>8</sup> University of Crete, Department of Materials Science & Technology, Heraklion 71003, Greece

\*Corresponding author email: r.pasquino@unina.it

### 1. Power law stress relaxation

The melts of rings exhibit a power law stress relaxation.

Table S1 below presents the absolute values of the fitted power law slopes of  $G(t)$  for polyisoprene and polystyrene rings data of Figure 2 of the main manuscript. Scaling exponents (slopes) obtained from the molecular dynamic simulations data<sup>1</sup> are shown as well. There seems to be a general tendency for the stress relaxation exponent to decrease as the degree of polymerization  $N$  increases. The lattice animal has a fractal exponent  $D=4$  and suggests a constant power-law slope of  $-0.4$ .<sup>2,3</sup> However, recent theoretical developments and in particular the loopy globule model<sup>4</sup> indicate that  $D=3$  and a limiting slope of  $-0.375$  for large  $N$ .

**Table S1. Power-law stress relaxation indices for rings**

| Samples           | Stress relaxation scaling exponents |
|-------------------|-------------------------------------|
| PI <sub>38</sub>  | -0.47<br>(±0.0008)                  |
| PI <sub>81</sub>  | -0.48<br>(±0.002)                   |
| PS <sub>160</sub> | -0.48<br>(±0.004)                   |
| PS <sub>198</sub> | -0.42<br>(±0.003)                   |

|                       |                  |
|-----------------------|------------------|
| N=100<br>See ref. (1) | -0.52<br>(±0.01) |
| N=400<br>See ref. (1) | -0.47<br>(±0.04) |

## 2. Analysis of lattice animal and loopy globule models

The lattice animal<sup>3,5</sup> (loopy globule)<sup>4</sup> models of self-similar stress relaxation of a ring in an array of fixed obstacles (in melt of other rings), predict the longest relaxation time  $\tau_{ring} \approx \tau_e Z^{5/2}$  for lattice animal ( $\tau_{ring} \approx \tau_e Z^{8/3}$  for loopy globule) and terminal modulus of kT per chain similar to Rouse model<sup>6-8</sup>  $G_{ring} \approx G_N/Z$ , which yield  $\eta_{0,ring} \sim N^{3/2}/N_e^{1/2}$  for lattice animal model ( $\eta_{0,ring} \sim N^{5/3}/N_e^{2/3}$  for loopy globule model). If we assume for simplicity pure reptation model<sup>9,10</sup>, then melt viscosity of linear polymers is  $\eta_{0,linear} \sim N^3/N_e^2$ . Hence, we obtain for the viscosity ratio  $\eta_{0,linear}/\eta_{0,ring} \sim (N/N_e)^{3/2} = Z^{3/2}$  for lattice animal model ( $\eta_{0,linear}/\eta_{0,ring} \sim (N/N_e)^{4/3} = Z^{4/3}$  for loopy globule model). If we consider contour length fluctuations corrections<sup>9,10</sup>, the result becomes  $\eta_{0,linear}/\eta_{0,ring} \sim Z^{1.9}$  for lattice animal model ( $\eta_{0,linear}/\eta_{0,ring} \sim Z^{1.7}$  for loopy globule model).

## 3. Determination of zero shear viscosities

In order to obtain the ratio  $\eta_{0,linear}/\eta_{0,ring}$ , the zero-shear viscosities of the ring and linear polymers for PI have been calculated with three different methods: by fitting the data with the Cross model, taking a value for the viscosity at the lowest reliable frequency and by fitting the data with the Carreau model<sup>11</sup>. This procedure has been applied at three different temperatures. An example for the calculation of the ratio  $\eta_{0,linear}/\eta_{0,ring}$  is shown in Table S2, for the case of  $M_w=81\text{kg/mol}$ .

Table S2. Example of calculation of the mean viscosities (in Pas) for linear and ring polyisoprenes with  $M_w=81\text{kg/mol}$

| T[°C] | Linear PI                                   |                                             |                   |                                             | Ring PI                                     |                                             |                                             |                                             | $\eta_{0,linear} / \eta_{0,ring}$ |
|-------|---------------------------------------------|---------------------------------------------|-------------------|---------------------------------------------|---------------------------------------------|---------------------------------------------|---------------------------------------------|---------------------------------------------|-----------------------------------|
|       | Cross                                       | Carreau                                     | Fixed freq        | Mean                                        | Cross                                       | Carreau                                     | Fixed Freq                                  | Mean                                        |                                   |
| 30    | 273<br>(±2.5)                               | 263<br>(±2)                                 | 263.5             | 266<br>(±5)                                 | 16.1 (±0.5)                                 | 15.7 (±0.58)                                | 13.2                                        | 15<br>(±1)                                  | 17.8<br>(±1.2)                    |
| 0     | $2.2 \times 10^4$<br>(±202)                 | $2.2 \times 10^4$<br>(±191)                 | $2.1 \times 10^4$ | $2.1 \times 10^4$<br>(±388)                 | 1286<br>(±38)                               | 1200<br>(±42.7)                             | 1312.6                                      | 1266<br>(±82.5)                             | 17<br>(±1.4)                      |
| -30   | $4.3 \times 10^7$<br>(± $3.8 \times 10^5$ ) | $4.1 \times 10^7$<br>(± $3.6 \times 10^5$ ) | $41 \times 10^7$  | $4.2 \times 10^7$<br>(± $3.7 \times 10^6$ ) | $2.4 \times 10^6$<br>(± $7.2 \times 10^4$ ) | $2.4 \times 10^6$<br>(± $9.2 \times 10^4$ ) | $2.2 \times 10^6$<br>(± $9.2 \times 10^4$ ) | $2.4 \times 10^6$<br>(± $9.7 \times 10^4$ ) | 17.7<br>(±1.7)                    |

Figure S1 shows the complex viscosities as function of frequency at three different reference temperatures for the linear (left) and the ring (right) polymers with  $M_w=81\text{kg/mol}$ . Figure S2 shows an example of fitting at a reference temperature of -30°C. The red lines are Cross model fits through the data, the green lines are Carreau model fits. The arrow indicates the fixed frequency at which the viscosity values are taken.

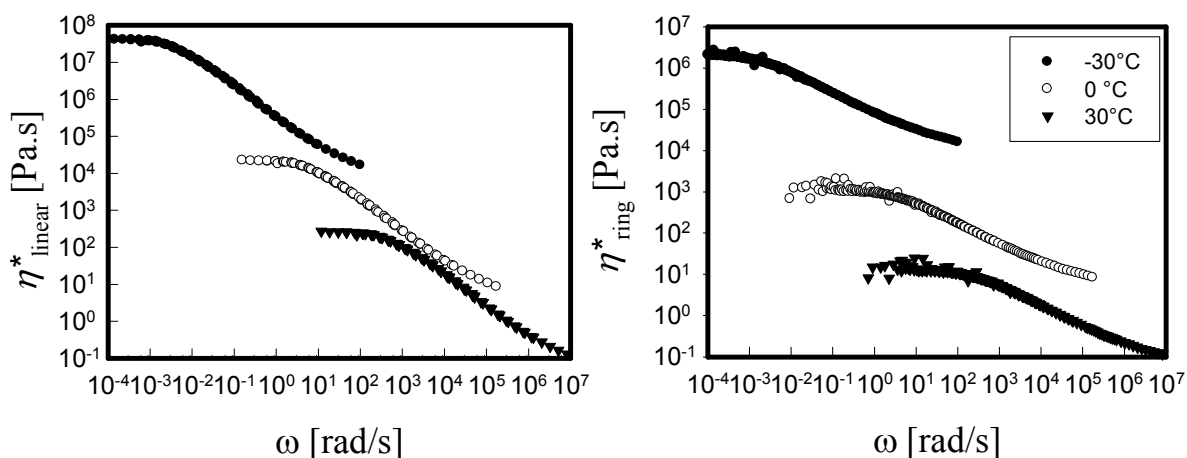

**Figure S1.** Complex viscosities as function of frequency for the linear polymer (left) and the ring polymer (right) with  $M_w=81\text{kg/mol}$  at different reference temperatures (see legend, valid for both graphs, for details).

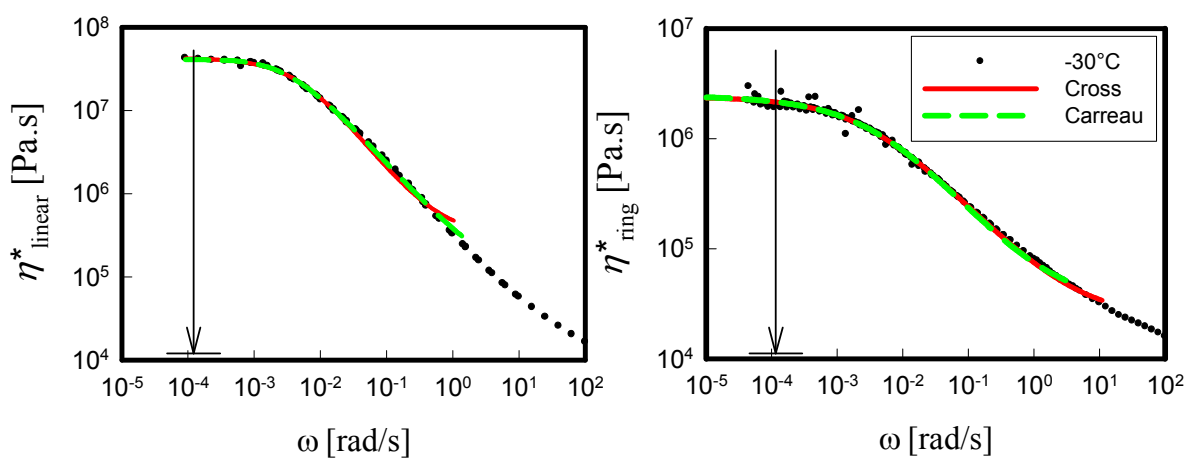

**Figure S2.** Example of fitting at  $-30^\circ\text{C}$  for the linear (left) and ring (right) polymers with  $M_w=81\text{kg/mol}$ . The legend is valid for both graphs.

Table S3 shows details of fitting at a fixed reference temperature for PI samples with different molecular weights. Clearly, the error is larger for rings in comparison to linear polymers, due to the fact that terminal slopes were not reached, which is reflected in an uncertainty in the determination of the zero-shear viscosity.

As a further example, Figure S3 shows the comparison between the shear viscosities for linear and ring polystyrene samples at  $170^\circ\text{C}$ . Table S4 summarizes the fitting parameters for the data shown in Figure S3.

**Table S3.** Viscosities for linear and ring polyisoprene polymers with different molecular weights at  $30^\circ\text{C}$

| Mw [kg/mol] | Linear PI              |                        |                 |                     | Ring PI                |                      |                 |                    |
|-------------|------------------------|------------------------|-----------------|---------------------|------------------------|----------------------|-----------------|--------------------|
|             | Cross                  | Carreau                | Fixed frequency | Mean                | Cross                  | Carreau              | Fixed frequency | Mean               |
| 24          | 80.1<br>( $\pm 0.24$ ) | 78.9<br>( $\pm 0.18$ ) | 80.5            | 80<br>( $\pm 0.4$ ) | 74.8<br>( $\pm 11.6$ ) | 61<br>( $\pm 17.5$ ) | 49.2            | 62<br>( $\pm 27$ ) |

|    |               |               |       |               |                |                 |      |             |
|----|---------------|---------------|-------|---------------|----------------|-----------------|------|-------------|
| 38 | 3500<br>(±18) | 3400<br>(±12) | 3300  | 3400<br>(±29) | 180<br>(±2)    | 186<br>(±3.3)   | 161  | 176<br>(±5) |
| 81 | 273<br>(±2.5) | 263<br>(±2.4) | 263.5 | 266<br>(±5)   | 16.1<br>(±0.5) | 15.7<br>(±0.58) | 13.2 | 15<br>(±1)  |

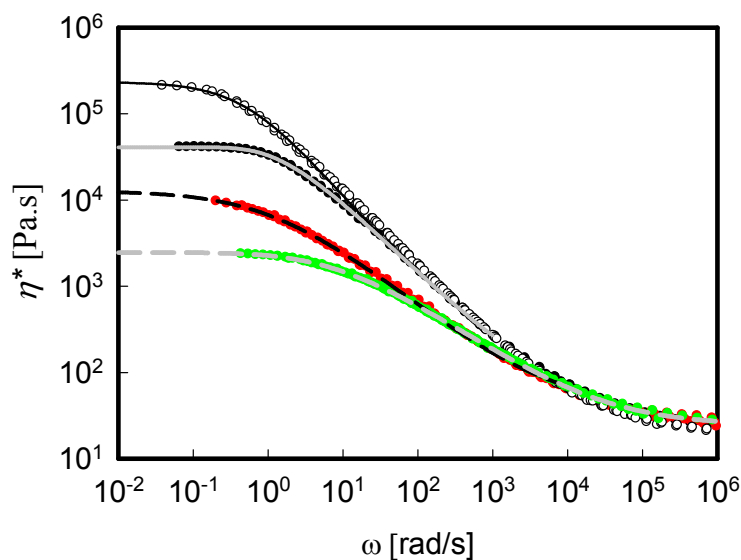

**Figure S3.** Complex viscosities for polystyrene samples at 170°C. Symbols are experimental data. ○: Ps linear 198k; ◻: Ps ring 198k; ◻: Ps linear 160k; ◻: Ps ring 160k. Lines are fits examples. —: Cross model fit for data on linear Ps 198k; - - -: Cross model fit for data on ring PS 198k; - · - ·: Carreau model fit for data on linear PS 160k; - · - ·: Carreau model fit for data on ring PS 160k.

**Table S4.** Viscosities for linear and ring polystyrene polymers with different molecular weights at 170°C

| Mw<br>[kg/mol] | Linear PS         |                   |                 |                    | Ring PS         |                 |                 |                 |
|----------------|-------------------|-------------------|-----------------|--------------------|-----------------|-----------------|-----------------|-----------------|
|                | Cross             | Carreau           | Fixed frequency | Mean               | Cross           | Carreau         | Fixed frequency | Mean            |
| 160            | 43240<br>(±236)   | 41460<br>(±56)    | 39000           | 41233<br>(±2129)   | 2666<br>(±11.6) | 2555<br>(±15.2) | 2354            | 2525<br>(±158)  |
| 198            | 217200<br>(±1007) | 234200<br>(±1656) | 187000          | 212800<br>(±23906) | 12750<br>(±133) | 11450<br>(±204) | 9709            | 11303<br>(±526) |

#### 4. Comparison between old data from 1980's and new data with additional details for Figure 3 (main manuscript).

The comparison between new data (fractionated by LCCC) and old data from literature (fractionated by common SEC, often multiple times) is shown in Figure S4. All LCCC-fractionated rings had purity larger or equal to 99.6%.<sup>312</sup> Table S5 lists references, chemistry and fractionation method for the experimental data on ring polymers shown in Figure S4.

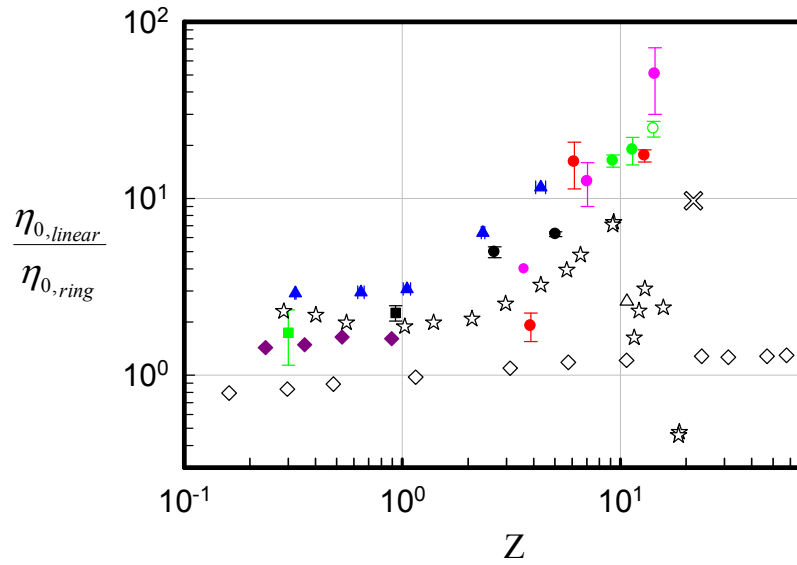

**Figure S4.** Ratio between the zero shear viscosities of the linear and ring polymers as function of the number of entanglements  $Z$  (see also main text). ●: PEO experimental data set; ●: PI experimental data set; ○: PS data, see Ref.(12); ●: PS experimental data set from Ref. (3); ■: PEO experimental data point from Ref. (13); ■: PS experimental data point from ring synthesized in theta solvent conditions, and characterized in Ref. (14); ◆: PEO experimental data set from Ref. (15); ▲: PE atomistic simulations data from Ref. (16); □: molecular dynamics simulations data on coarse-grained bead-spring chains from Ref. (1); ☆: PS data from Ref. (17), reporting synthesis in theta solvent conditions; ◇: PDMS data from Ref. (18); △: PS data from Ref. (19), reporting synthesis in good solvent conditions; ×: PBD data from Ref. (20), reporting synthesis in good solvent conditions.

In the entangled regime, there is a clear scatter of the data. The old literature data were taken on rings purified via SEC, often multiple times<sup>19,20</sup>, and precipitation<sup>18</sup>. They have much higher viscosities, presumably due to insufficient fractionation, which left a non-negligible fraction of linear contaminants in the samples. This leads to lower ratios  $\eta_{0,linear}/\eta_{0,ring}$  at high  $Z$ , in comparison to the new values based on rings purified by LCCC. Moreover the scatter in the old data is higher as the molecular weight increases, and this is again attributed to the contamination. It is tempting to consider the onset of entanglements, which is known to occur at the critical molecular weight<sup>19</sup>. However, to have a firm result, data from many rings over a wide range of molar masses are needed, something that is not yet possible. Hence, we restrict our discussion using the linear polymer entanglement molecular weight as the scaling parameter.

**Table S5.** Details for ring samples shown in Figure 3 of the main manuscript

|                                        | Fractionation method   | Chemistry |
|----------------------------------------|------------------------|-----------|
| Current work                           | LCCC                   | PI, PEO   |
| Kapnistos <i>et al.</i> <sup>3</sup>   | LCCC                   | PS        |
| Nam <i>et al.</i> <sup>15</sup>        | Precipitation          | POE       |
| Bras <i>et al.</i> <sup>13</sup>       | Multiple SEC           | PEO       |
| Roovers and Toporowski <sup>17</sup>   | Precipitation          | PS        |
| Roovers and Toporowski <sup>20</sup>   | SEC                    | PBD       |
| McKenna <i>et al.</i> <sup>19</sup>    | Multiple SEC           | PS        |
| Orrah <i>et al.</i> <sup>18</sup>      | Precipitation          | PDMS      |
| Santangelo <i>et al.</i> <sup>14</sup> | Precipitation and LCCC | PS        |
| Cho <i>et al.</i> <sup>12</sup>        | LCCC                   | PS        |

## 5. Conversion of MD units

Plots of stress relaxation moduli for ring polymers are given in (1) as  $G(t)\sigma^3/\varepsilon$  as a function of  $t/\tau$ , with  $\varepsilon=k_B T$ ,  $\rho\sigma^3=0.85$  and  $\tau=\sigma(m/\varepsilon)^{1/2}$ , where  $m$  is the mass of a monomer<sup>17</sup>. Hence, given the values in (17), the conversion from MD units into Pascal

(y-axis) and seconds (x-axis) is possible by multiplying the y-axis of Figure 6(b) in Ref. (1) by 3.3MPa and the relative x-axis by  $3.1 \times 10^{-8}$  s. A horizontal shift factor has been also used for shifting the data at isofrictional conditions ( $aT=0.035$ )<sup>22</sup>.

## References

- (1) Halverson, J. D.; Lee, W. B.; Grest, G. S.; Grosberg, A. Y.; Kremer, K. J. *Chem. Phys.* **2011**, *134*, 204905-1-204905-10.
- (2) Obukhov, S. P.; Rubinstein, M.; Duke, T. *Phys. Rev. Lett.* **1994**, *73*, 1264-1266.
- (3) Kapnistos, M.; Lang, M.; Vlassopoulos, D.; Pyckhout-Hintzen, W.; Richter, D.; Cho, D.; Chang, T.; Rubinstein, M. *Nature Materials* **2008**, *7*, 997-1002.
- (4) Rubinstein, M.; Sariyer, O.; Panyukov, S. P. manuscript in preparation **2013**.
- (5) Obukhov, S. P.; Rubinstein, M.; Duke, T. *Phys. Rev. Lett.* **1994**, *73*, 1264-1266.
- (6) Rouse, P. E. *J. Chem. Phys.* **1953**, *21*, 1272-1280.
- (7) De Gennes, P.G. *Macromolecules* **1976**, *9*, 587-593.
- (8) Rubinstein, M.; Colby, R. H. *Polymer Physics; Oxford Univ. Press*, **2003**.
- (9) Doi, M.; Edwards, S.F. *The theory of polymer dynamics*, Oxford University Press, **1988**.
- (10) Doi, M.; Edwards, S.F. *J. Chem. Soc. Faraday Trans.* **1978**, *2*, 38-54, 1789-1801, 1802-1817, 1818-1832.
- (11) Macosko C.W. *Rheology: principles, methods and applications*, Wiley-VCH, **1994**.
- (12) Cho, D.; Masuoka, K.; Koguchi, K.; Asari, T.; Kawaguchi, D.; Takano, A.; Matsushita, Y. *Polymer J.* **2005**, *37*, 506-511.
- (13) Bras, A. R.; Pasquino, R.; Koukoulas, T.; Tsolou, G.; Holderer, O.; Radulescu, A.; Allgaier, J.; Mavrantzas, V. G.; Pyckhout-Hintzen, W.; Wischniewski, A.; Vlassopoulos, D.; Richter, D. *Soft Matter*, **2011**, *7*, 11169-11176.
- (14) Santangelo, P. G.; Roland, C.; Chang, T.; Cho, D.; Roovers, J. *Macromolecules* **2001**, *34*, 9002-9005.
- (15) Nam, S.; Leisen, J.; Breedveld, V.; Beckham, H. W. *Polymer* **2008**, *49*, 5467-5473.
- (16) Tsolou, G.; Stratikis, N.; Baig, G.; Stephanou, P. S.; Mavrantzas, V. G. *Macromolecules* **2010**, *43*, 10692-10713.
- (17) Roovers, J.; Toporowski, P. M. *Macromolecules* **1983**, *16*, 843.
- (18) Orrah, D. J.; Semlyen, J. A.; Ross-Murphy, S. B. *Polymer* **1988**, *29*, 1452-1454.
- (19) McKenna, G. B.; Hostetter, B. J.; Hadjichristidis, N.; Fetters, L. J.; Plazek, D. J. *Macromolecules* **1989**, *22*, 1834-1852.
- (20) Roovers, J.; Toporowski, P. M. *Journal of Polymer Science - Part B Polymer Physics* **1988**, *26*, 1251-1259.
- (21) Halverson, J. D.; Lee, W. B.; Grest, G. S.; Grosberg, A. Y.; Kremer, K. J. *Chem. Phys.* **2011**, *134*, 204904-1-204914-12.
- (22) Dealy, J. M.; Larson, R. G. *Structure and rheology of molten polymers*. Hanser Verlag, Munich **2006**.
